# Supplementary material for: Quantification of Analgesic and Anti-inflammatory Lipid Mediators in Long-Term Cryopreserved and Freeze-Dried Preserved Human Amniotic Membrane
Source: Preprints.org preprint supplement (doi:10.20944/preprints202305.1876.v1), 2023-05-26
Supplement: Supplementary file 1 [file supplementary]

## Sheet: S1_Deco vs all
	Supplementary Table S1
	Statistical significance between decontaminated and other samples (fresh, cryopreserved, freeze-dried)
	PEA
	Placenta	Fresh	Deco	Cryo 6 m	Cryo 1 y	Cryo 4 y	Cryo 10 y	F-Dry 1 y
	P1	217.546	1487.36	1817.5	1362.33	991.333	267	2013.88
	P2	239.342	1383.82	684	1273.33	569.834	351	906.992
	P3	148.161	1218.37	895.667	497.073	243.125	667.737	603.459
	P4	662.223	1369.13	627.749	247.97	261.304	433.207	1094.44
	P5	395.33	1502.71	321.272	387.19	280.476	748	500.763
	P6	171.077	1169.34	485.801	590.366	881.5	900	2195.56
	P7	258.841	768.348	811.817	992.5	261.905	n/a	1347.16
	P8	652.875	958.968	n/a	828	622	n/a	311.836
	P9	169.264	1317.81	n/a	1137	363	n/a	n/a
	AV	323.851	1241.76	806.258	812.863	497.164	561.157	1121.76
	SD	202.68	245.072	485.687	403.275	285.755	248.254	692.495
	Mann-Whitney U test
	Samples		P value	Significance
	Deco vs Fresh		<0.0001	****
	Deco vs Cryo 6 m		0.0311	*
	Deco vs Cryo 1 y		0.018	*
	Deco vs Cryo 4 y		0.0003	***
	Deco vs Cryo 10 y		0.0008	***
	Deco vs F-Dry 1 y		0.5071	ns
	OEA
	Placenta	Fresh	Deco	Cryo 6 m	Cryo 1 y	Cryo 4 y	Cryo 10 y	F-Dry 1 y
	P1	126.755	174.313	593.804	417.335	474.311	326.07	798.468
	P2	115.26	324.58	211.281	462.892	266.727	236.904	239.008
	P3	59.7956	241.456	367.034	141.243	224.375	338	153.303
	P4	150.745	294.67	489.6	134.503	223.043	454.44	349.365
	P5	101.691	404.21	110.894	206.9	261.905	113.422	365.829
	P6	65.5694	591.05	186.168	210.895	187.247	n/a	n/a
	P7	67.9622	218.22	241.35	158.124	113.422	n/a	803.169
	P8	223.061	353.5	n/a	352.092	171.883	n/a	372.639
	P9	48.1667	281.82	n/a	441.051	127.884	n/a	n/a
	AV	106.556	320.424	314.304	280.56	227.866	293.767	440.255
	SD	55.6763	123.265	175.765	136.399	106.839	127.057	258.598
	Mann-Whitney U test
	Samples		P value	Significance
	Deco vs Fresh		0.0002	***
	Deco vs Cryo 6 m		0.7577	ns
	Deco vs Cryo 1 y		0.4894	ns
	Deco vs Cryo 4 y		0.0625	ns
	Deco vs Cryo 10 y		>0.9999	ns
	Deco vs F-Dry 1 y		0.4079	ns
	AEA
	Placenta	Fresh	Deco	Cryo 6 m	Cryo 1 y	Cryo 4 y	Cryo 10 y	F-Dry 1 y
	P1	11.6712	20.4271	109.17	58.4566	33.1351	30.2794	317.231
	P2	12.7088	36.4463	26.0973	61.8655	26.1879	29.2914	36.6694
	P3	4.97831	11.7443	59.9841	24.8365	13.9375	39.1892	24.2275
	P4	17.7719	22.5994	16.0225	15.2384	13.4348	60.2986	60.9839
	P5	9.27693	37.4735	19.0357	27.2062	35.0827	n/a	223.281
	P6 (P11)	17.9156	87.0729	29.6081	31.0291	7.52381	n/a	n/a
	P7	17.7088	75.4183	42.4303	27.3266	n/a	n/a	n/a
	P8 (P10)	17.0921	37.5227	n/a	58.9982	12.0307	n/a	297.604
	P9	24.6926	63.5053	n/a	88.3454	29.1216	n/a	n/a
	AV	14.8685	43.5789	43.1926	43.7003	21.3067	39.7647	160
	SD	5.82245	26.0215	32.7469	24.0873	10.7362	14.3948	134.989
	Mann-Whitney U test
	Samples		P value	Significance
	Deco vs Fresh		0.0028	**
	Deco vs Cryo 6 m		0.8371	ns
	Deco vs Cryo 1 y		>0.9999	ns
	Deco vs Cryo 4 y		0.0464	ns
	Deco vs Cryo 10 y		>0.9999	ns
	Deco vs F-Dry 1 y		0.1447	ns

## Sheet: S2_Fresh vs all
	Supplementary Table S2
	Statistical significance between fresh and other samples (cryopreserved, freeze-dried)
	PEA
	Placenta	Fresh	Deco	Cryo 6 m	Cryo 1 y	Cryo 4 y	Cryo 10 y	F-Dry 1 y
	P1	217.546	1487.36	1817.5	1362.33	991.333	267	2013.88
	P2	239.342	1383.82	684	1273.33	569.834	351	906.992
	P3	148.161	1218.37	895.667	497.073	243.125	667.737	603.459
	P4	662.223	1369.13	627.749	247.97	261.304	433.207	1094.44
	P5	395.33	1502.71	321.272	387.19	280.476	748	500.763
	P6	171.077	1169.34	485.801	590.366	881.5	900	2195.56
	P7	258.841	768.348	811.817	992.5	261.905	n/a	1347.16
	P8	652.875	958.968	n/a	828	622	n/a	311.836
	P9	169.264	1317.81	n/a	1137	363	n/a	n/a
	AV	323.851	1241.76	806.258	812.863	497.164	561.157	1121.76
	SD	202.68	245.072	485.687	403.275	285.755	248.254	692.495
	Mann-Whitney U test
	Samples		P value	Significance
	Deco vs Fresh		<0.0001	****
	Fresh vs Cryo 6 m		0.0079	**
	Fresh vs Cryo 1 y		0.0078	**
	Fresh vs Cryo 4 y		0.077	ns
	Freshvs Cryo 10 y		0.0256	*
	Fresh vs F-Dry 1 y		0.0042	**
	OEA
	Placenta	Fresh	Deco	Cryo 6 m	Cryo 1 y	Cryo 4 y	Cryo 10 y	F-Dry 1 y
	P1	126.755	174.313	593.804	417.335	474.311	326.07	798.468
	P2	115.26	324.58	211.281	462.892	266.727	236.904	239.008
	P3	59.7956	241.456	367.034	141.243	224.375	338	153.303
	P4	150.745	294.67	489.6	134.503	223.043	454.44	349.365
	P5	101.691	404.21	110.894	206.9	261.905	113.422	365.829
	P6	65.5694	591.05	186.168	210.895	187.247	n/a	n/a
	P7	67.9622	218.22	241.35	158.124	113.422	n/a	803.169
	P8	223.061	353.5	n/a	352.092	171.883	n/a	372.639
	P9	48.1667	281.82	n/a	441.051	127.884	n/a	n/a
	AV	106.556	320.424	314.304	280.56	227.866	293.767	440.255
	SD	55.6763	123.265	175.765	136.399	106.839	127.057	258.598
	Mann-Whitney U test
	Samples		P value	Significance
	Deco vs Fresh		0.0002	***
	Fresh vs Cryo 6 m		0.0052	**
	Fresh vs Cryo 1 y		0.0019	**
	Fresh vs Cryo 4 y		0.004	**
	Fresh vs Cryo 10 y		0.012	*
	Fresh vs F-Dry 1 y		0.0003	***
	AEA
	Placenta	Fresh	Deco	Cryo 6 m	Cryo 1 y	Cryo 4 y	Cryo 10 y	F-Dry 1 y
	P1	11.6712	20.4271	109.17	58.4566	33.1351	30.2794	317.231
	P2	12.7088	36.4463	26.0973	61.8655	26.1879	29.2914	36.6694
	P3	4.97831	11.7443	59.9841	24.8365	13.9375	39.1892	24.2275
	P4	17.7719	22.5994	16.0225	15.2384	13.4348	60.2986	60.9839
	P5	9.27693	37.4735	19.0357	27.2062	35.0827	n/a	223.281
	P6 (P11)	17.9156	87.0729	29.6081	31.0291	7.52381	n/a	n/a
	P7	17.7088	75.4183	42.4303	27.3266	n/a	n/a	n/a
	P8 (P10)	17.0921	37.5227	n/a	58.9982	12.0307	n/a	297.604
	P9	24.6926	63.5053	n/a	88.3454	29.1216	n/a	n/a
	AV	14.8685	43.5789	43.1926	43.7003	21.3067	39.7647	160
	SD	5.82245	26.0215	32.7469	24.0873	10.7362	14.3948	134.989
	Mann-Whitney U test
	Samples		P value	Significance
	Deco vs Fresh		0.0028	**
	Fresh vs Cryo 6 m		0.0052	**
	Fresh vs Cryo 1 y		0.0008	***
	Fresh vs Cryo 4 y		0.2766	ns
	Fresh vs Cryo 10 y		0.0028	**
	Fresh vs F-Dry 1 y		0.0008	***
